# Supplementary material for: Use of NH (A3Π–X3Σ−) sonoluminescence for diagnostics of nonequilibrium plasma produced by multibubble cavitation
Source: Royal Society of Chemistry journal article supplement (doi:10.1039/c7cp04813k), 2017-01-01
Supplement: c7cp04813k1.pdf [file c7cp04813k1.pdf]

## Electronic Supplementary Information

### Use of $\text{NH}(\text{A}^3\Pi-\text{X}^3\Sigma^-)$ sonoluminescence for diagnostics of nonequilibrium plasma produced by multibubble cavitation

Rachel Pflieger, Temim Ouerhani, Thierry Belmonte, Sergey I. Nikitenko

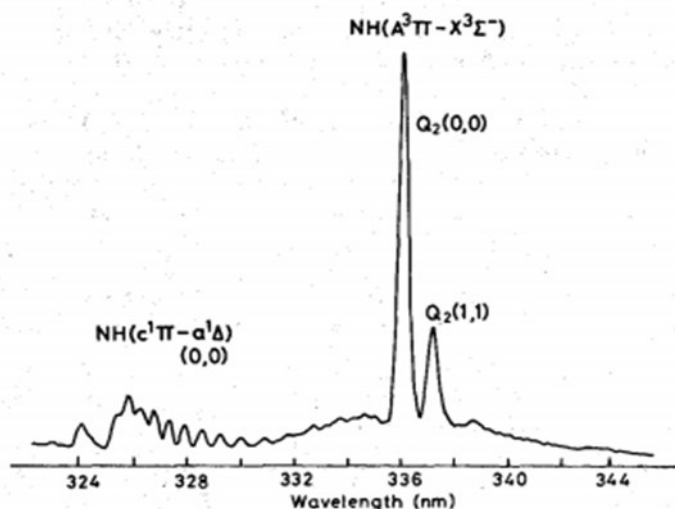

**Fig. S1.** Typical  $\text{NH}^*$  emission spectrum observed in an Ar afterglow. The Ar pressure is 0.3 Torr and the  $\text{NH}_3$  pressure is  $3 \cdot 10^{-3}$  Torr. Spectral resolution is 4 Å. The spectrum was reproduced from Ref. 7.

### Simulation of SL spectra with Specair software

Emissions of  $\text{NH}(\text{A}^3\Pi)$  and  $\text{OH}(\text{A}^2\Sigma^+)$  were simulated using Specair software. For each simulation, the variable parameters were the species vibrational temperature  $T_v$ , its rotational temperature  $T_r$  and the pressure  $p$  inside the collapsing bubble. The gas temperature was taken equal to  $T_r$ . Calculated spectra were convoluted with the experimental slit function to account for instrument broadening.

An automatic fitting tool of all parameters ( $T_v$ ,  $T_r$ ,  $p$ ) is provided in Specair software, but does not lead to convergence in the particular case of SL spectra. This is due to a relatively high scattering in the signal (because of the low SL light intensity), a low spectral resolution and their strong broadening. Therefore it was necessary to optimize the various parameters manually in a row:  $T_v$  and  $T_r$  to reproduce the relative intensities of the different rovibronic transitions (e.g. for OH  $T_v$  reflects in the relative intensities of 0-0 at 309 nm, 1-1 at 312 nm and 2-2 at 315 nm, while  $T_r$  reflects in the relative intensities of the Q and R branches of 0-0 transition, at 307 & 309 nm), and  $p$  to fit the broadness of the peaks.

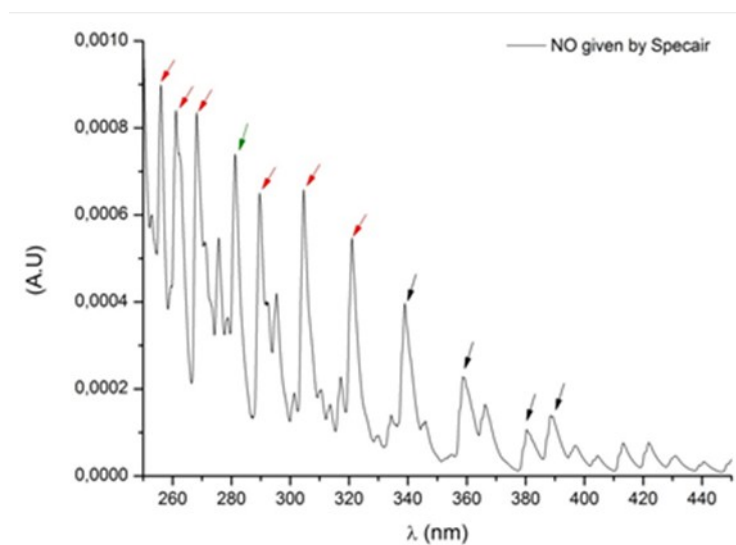

**Fig. S2.** NO emission spectrum simulated with Specair for  $T_v = 7000$  K and  $T_r = 1000$  K.

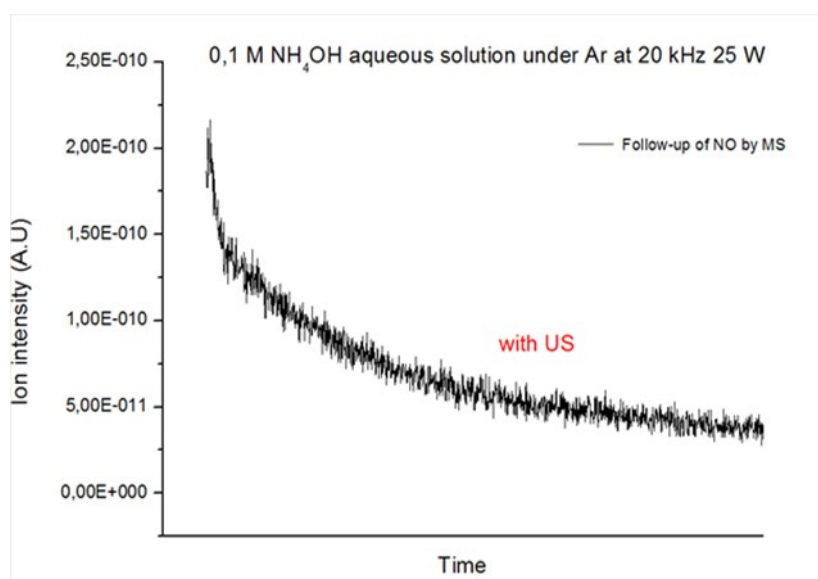

**Fig. S3.** Mass spectrometric signal of NO during sonolysis of 0.1M  $\text{NH}_3 \cdot \text{H}_2\text{O}$  solution in the presence of Ar at 20 kHz ultrasound,  $P = 25$  W,  $T = 20^\circ\text{C}$ .
